# Supplementary material
Source: MDPI journal article supplement (https://www.mdpi.com/2504-4494/7/1/44)
Supplement: s1 [file s1 › jmmp-2162078-supplementary.pdf]

# Influence of Ambient Temperature and Crystalline Structure on Fracture Toughness and Production of Thermoplastic by Enclosure FDM 3D Printer

Supaphorn Thumsorn <sup>1,\*</sup>, Wattanachai Prasong <sup>2</sup>, Akira Ishigami <sup>1,3</sup>, Takashi Kurose <sup>1,4</sup>, Yutaka Kobayashi <sup>1</sup> and Hiroshi Ito <sup>1,3,\*</sup>

<sup>1</sup> Research Center for GREEN Materials and Advanced Processing, Yamagata University, 4-3-16 Jonan, Yonezawa 992-8510, Yamagata, Japan

<sup>2</sup> Department of Industrial Engineering, Faculty of Engineering, Pathumwan Institute of Technology, 833 Rama I Road, Wangmai, Pathumwan, Bangkok 10330, Thailand

<sup>3</sup> Graduate School of Organic Materials Science, Yamagata University, 4-3-16 Jonan, Yonezawa 992-8510, Yamagata, Japan

<sup>4</sup> Department of Mechanical Engineering, Faculty of Science and Technology, Shizuoka Institute of Science and Technology, 2200-2 Toyosawa, Fukuroi 437-8555, Shizuoka, Japan

\* Correspondence: thumsorn@yz.yamagata-u.ac.jp (S.T.); ihiroshi@yz.yamagata-u.ac.jp (H.I.); Tel.: +81-(23)-8263081 (H.I.)

## Supplementary Data

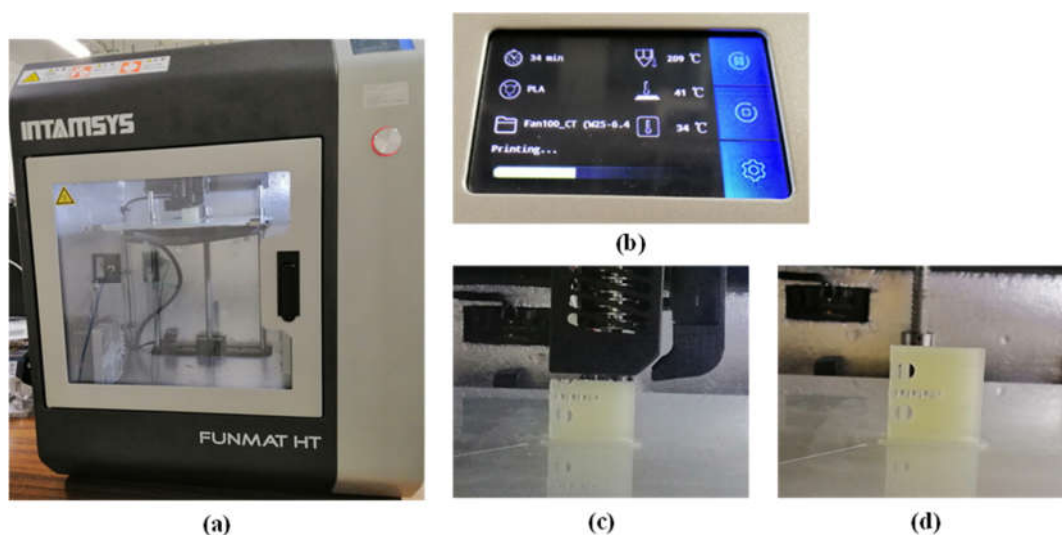

**Figure S1.** (a) Photograph of FUNMAT HT enclosure FDM 3D printer, (b) Control panel and display of the printer, (c) Nozzle head and cooling fan during printing compact tension specimen, and (d) 3D printed compact tension specimen

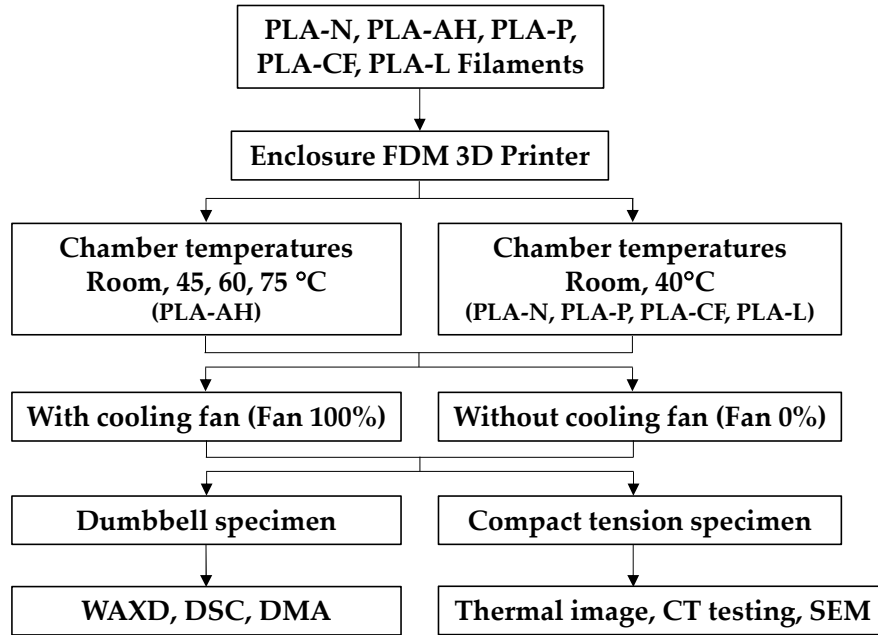

**Figure S2.** Experimental flow chart

### Design of Experiments (DOE)

A full factorial design in possible combinations of levels of multiple factors was used for the experimental plan on statistic approach as represented in Table 2 by setting the chamber temperatures and the cooling fans as variables. The experimental plan and design matrix for the variable of fracture toughness of the PLA-AH and the PLA-N are shown in Tables S1 and S2, respectively. Overall, the experimental plan provided a clear and accurate description of the full factorial design method [48-50].

**Table S1.** Experimental plan and design matrix for the variable of fracture toughness of PLA-AH

| Run order | Chamber temperature<br>(°C) | Cooling fan<br>(%) | Fracture toughness<br>(MPa·m <sup>1/2</sup> ) |
|-----------|-----------------------------|--------------------|-----------------------------------------------|
| 1         | 25                          | 0                  | 184.28                                        |
| 2         | 25                          | 100                | 98.71                                         |
| 3         | 45                          | 0                  | 204.83                                        |
| 4         | 45                          | 100                | 113.35                                        |
| 5         | 60                          | 0                  | 205.49                                        |
| 6         | 60                          | 100                | 123.57                                        |
| 7         | 60                          | 0                  | 205.49                                        |
| 8         | 75                          | 0                  | 206.66                                        |
| 9         | 75                          | 100                | 121.79                                        |
| 10        | 25                          | 0                  | 184.99                                        |
| 11        | 25                          | 100                | 90.06                                         |
| 12        | 45                          | 0                  | 203.11                                        |
| 13        | 45                          | 100                | 116.48                                        |
| 14        | 60                          | 0                  | 207.81                                        |
| 15        | 60                          | 100                | 116.68                                        |
| 16        | 60                          | 0                  | 207.81                                        |
| 17        | 75                          | 0                  | 194.53                                        |
| 18        | 75                          | 100                | 131.19                                        |
| 19        | 25                          | 0                  | 198.18                                        |
| 20        | 25                          | 100                | 99.5578                                       |
| 21        | 45                          | 0                  | 187.19                                        |
| 22        | 45                          | 100                | 106.27                                        |
| 23        | 60                          | 0                  | 207.58                                        |
| 24        | 60                          | 100                | 116.44                                        |
| 25        | 60                          | 0                  | 207.58                                        |
| 26        | 75                          | 0                  | 202.36                                        |
| 27        | 75                          | 100                | 115.23                                        |

**Table S2.** Experimental plan and design matrix for the variable of fracture toughness of PLA-N

| Run order | Chamber temperature<br>(°C) | Cooling fan<br>(%) | Fracture toughness<br>(MPa·m <sup>1/2</sup> ) |
|-----------|-----------------------------|--------------------|-----------------------------------------------|
| 1         | 40                          | 100                | 109.72                                        |
| 2         | 40                          | 0                  | 169.24                                        |
| 3         | 25                          | 0                  | 154.28                                        |
| 4         | 25                          | 100                | 85.87                                         |
| 5         | 40                          | 100                | 102.43                                        |
| 6         | 40                          | 0                  | 176.48                                        |
| 7         | 25                          | 0                  | 163.90                                        |
| 8         | 25                          | 100                | 88.40                                         |
| 9         | 40                          | 100                | 86.22                                         |
| 10        | 40                          | 0                  | 187.45                                        |
| 11        | 25                          | 0                  | 175.56                                        |
| 12        | 25                          | 100                | 88.36                                         |

The full factorial design was carried out to determine the relationship between responses and input parameters. The independent variables are used to express the response functions for the fracture toughness. The main effects and the interactions of the factors on the response variable of interest can be expressed as [48]

$$\mu_{ij} = \mu + \tau_i + \beta_j + (\tau\beta)_{ij} \quad (S1)$$

Where  $\mu_{ij}$  is the regression model.

$ij$  = row and column treatments

$\mu$  = coefficients of the model

$\tau$  = factor A

$\tau\beta$  = interaction between factors A and B

## Mathematics and Statistics Analysis

Statistical analysis is performed to find the terms in the analysis of variance (ANOVA) that have a significant effect on fracture toughness.

**Table S3.** Analysis of variance of PLA-AH

| Analysis of Variance |         |         |           |            |         |
|----------------------|---------|---------|-----------|------------|---------|
| Source               | DF      | Adj SS  | Adj MS    | F-Value    | P-Value |
| Model                | 4       | 53452.6 | 13363.2   | 353.54     | 0.000   |
| Linear               | 4       | 53452.6 | 13363.2   | 353.54     | 0.000   |
| Chamber Temp         | 3       | 1729.6  | 576.5     | 15.25      | 0.000   |
| Cooling Fan          | 1       | 48742.6 | 48742.6   | 1289.57    | 0.000   |
| Error                | 22      | 831.5   | 37.8      |            |         |
| Lack-of-Fit          | 3       | 166.2   | 55.4      | 1.58       | 0.227   |
| Pure Error           | 19      | 665.3   | 35.0      |            |         |
| Total                | 26      | 54284.2 |           |            |         |
| Model Summary        |         |         |           |            |         |
|                      | S       | R-sq    | R-sq(adj) | R-sq(pred) |         |
|                      | 6.14798 | 98.47%  | 98.19%    | 97.59%     |         |

The coded unit regression model allows for the examination of the relationship between the response variable and multiple independent variables. Therefore, the process optimization and quality control on the fracture toughness of PLA-AH can be expressed as the following.

### *Fracture toughness*

$$\begin{aligned}
 &= 155.74 - 13.11(\text{Chamber temp}_{25}) - 0.54(\text{Chamber temp}_{45}) \\
 &\quad + 7.43(\text{Chamber temp}_{60}) + 6.22(\text{Chamber temp}_{75}) \\
 &\quad + 43.30(\text{Cooling fan}_0) - 43.30(\text{Cooling fan}_{100})
 \end{aligned} \tag{S2}$$

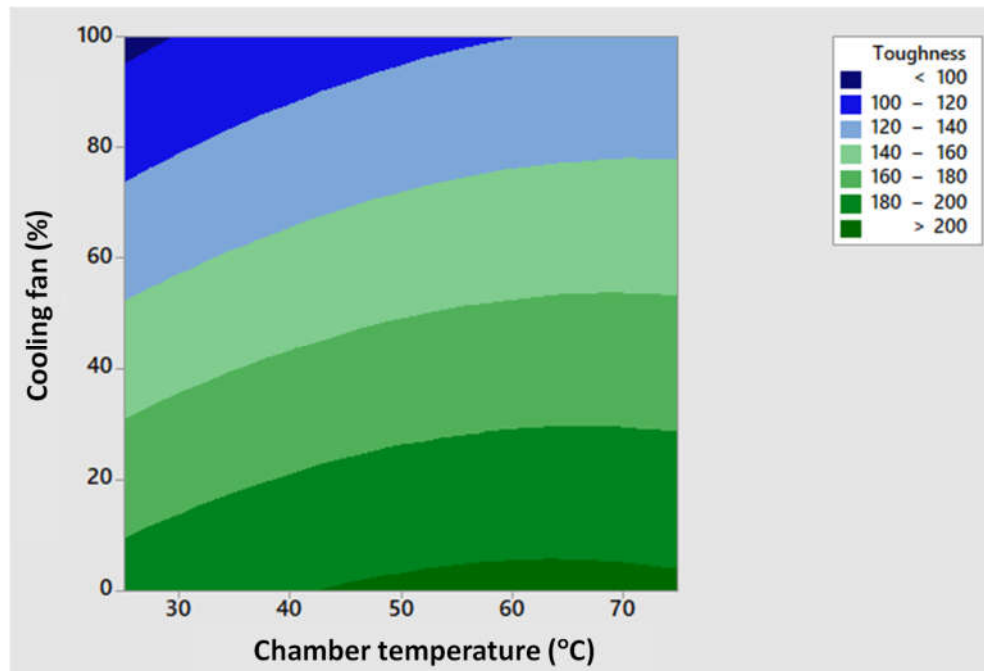

**Figure S3.** Contour plot between cooling fan and chamber temperature for fracture toughness of PLA-AH

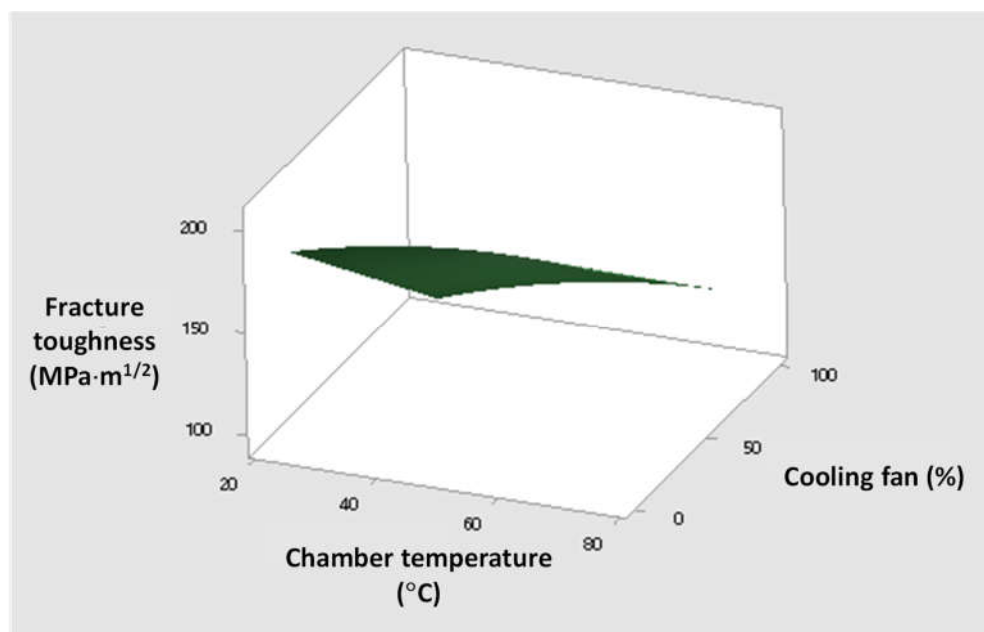

**Figure S4.** Surface response between cooling fan and chamber temperature on fracture toughness of PLA-AH

**Table S4.** Analysis of variance of PLA-N

| Analysis of Variance |         |         |           |            |         |
|----------------------|---------|---------|-----------|------------|---------|
| Source               | DF      | Adj SS  | Adj MS    | F-Value    | P-Value |
| Model                | 2       | 18559.2 | 9279.6    | 121.07     | 0.000   |
| Linear               | 2       | 18559.2 | 9279.6    | 121.07     | 0.000   |
| Chamber Temp         | 1       | 470.9   | 470.9     | 6.14       | 0.035   |
| Cooling Fan          | 1       | 18088.3 | 18088.3   | 236.00     | 0.000   |
| Error                | 9       | 689.8   | 76.6      |            |         |
| Lack-of-Fit          | 1       | 1.1     | 1.1       | 0.01       | 0.912   |
| Pure Error           | 8       | 688.7   | 86.1      |            |         |
| Total                | 11      | 19249.0 |           |            |         |
| Model Summary        |         |         |           |            |         |
|                      | S       | R-sq    | R-sq(adj) | R-sq(pred) |         |
|                      | 8.75476 | 96.42%  | 95.62%    | 93.63%     |         |

The mathematical model for the fracture toughness of the PLA-N in the terms of the coded factors is presented as the following.

$$\text{Fracture toughness} = 144.0 + 0.835(\text{Chamber temp}) - 0.7765(\text{Cooling fan}) \quad (\text{S3})$$

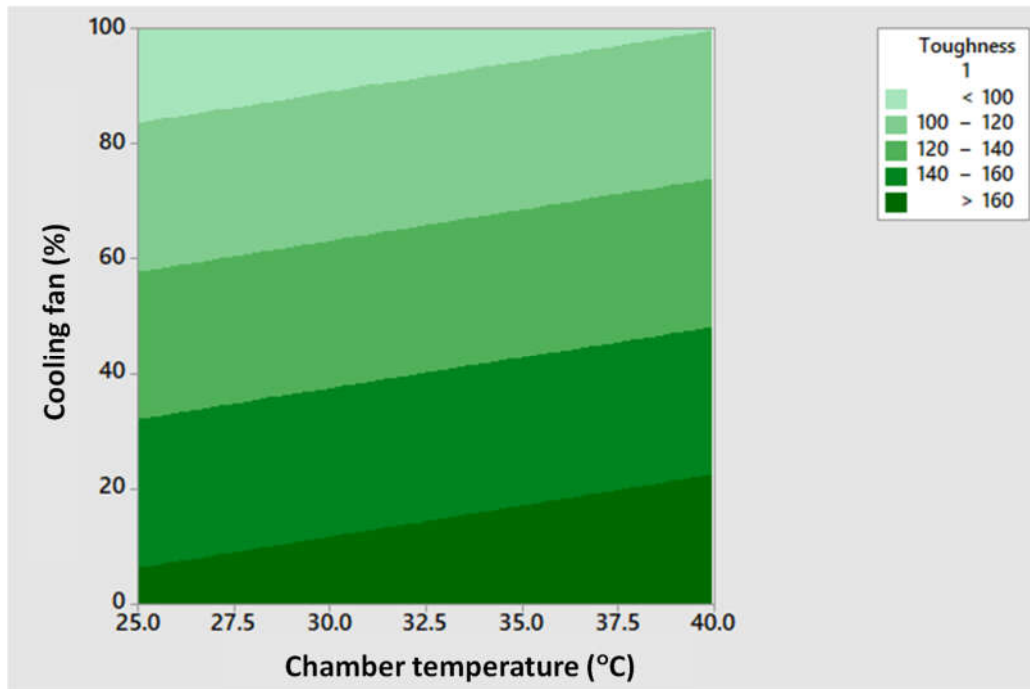

**Figure S5.** Contour plot between cooling fan and chamber temperature for fracture toughness of PLA-N

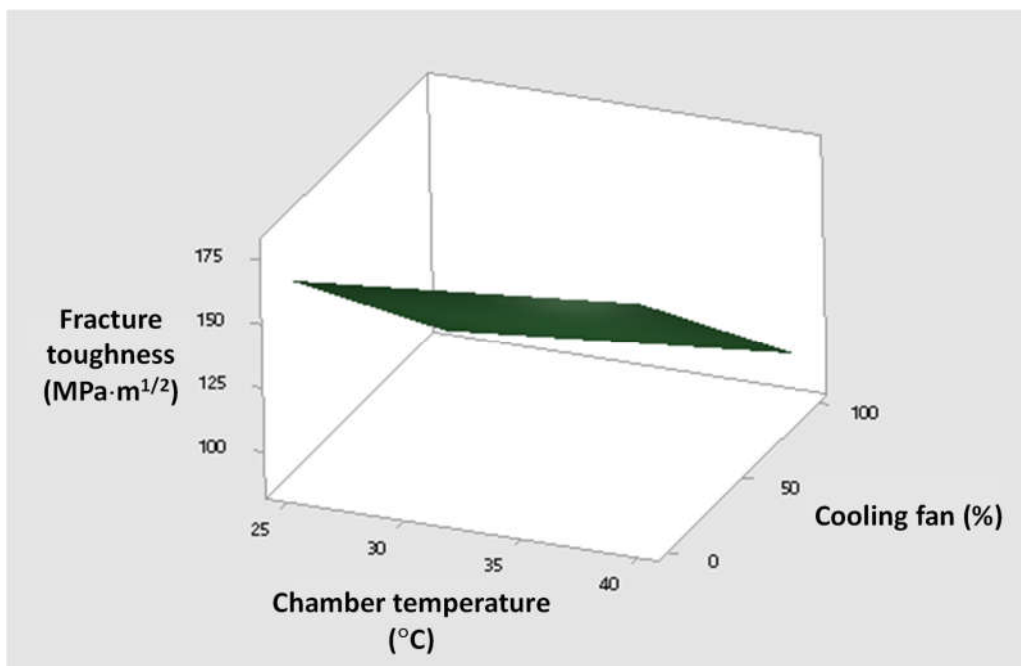

**Figure S6.** Surface response between cooling fan and chamber temperature on fracture toughness of PLA-N
